# Effects of Face Repetition on Ventral Visual Stream Connectivity using Dynamic Causal Modelling of fMRI data

Sung-Mu Lee<sup>1,2</sup>, Roni Tibon<sup>2,3</sup>, Peter Zeidman<sup>4</sup>, Pranay S. Yadav<sup>2</sup>, and Richard Henson<sup>2,5</sup>

<sup>1</sup>Taiwan International Graduate Program in Interdisciplinary Neuroscience, National Cheng Kung University and Academia Sinica, Taipei, Taiwan

<sup>2</sup>MRC Cognition and Brain Sciences Unit, University of Cambridge, Cambridge, UK

<sup>3</sup>School of Psychology, University of Nottingham, Nottingham, UK

<sup>4</sup>Wellcome Centre for Human Neuroimaging, Institute of Neurology, University College London, London, UK

<sup>5</sup>Department of Psychiatry, University of Cambridge, Cambridge, UK

## Abstract

Stimulus repetition normally causes reduced neural activity in brain regions that process that stimulus. Some theories claim that this “repetition suppression” reflects local mechanisms such as neuronal fatigue or sharpening within a region, whereas other theories claim that it results from changed connectivity between regions, following changes in synchrony or top-down predictions. In this study, we applied dynamic causal modelling (DCM) on a public fMRI dataset involving repeated presentations of faces and scrambled faces to test whether repetition affected local (self-connections) and/or between-region connectivity in left and right early visual cortex (EVC), occipital face area (OFA) and fusiform face area (FFA). Face “perception” (faces versus scrambled faces) modulated nearly all connections, within and between regions, including direct connections from EVC to FFA, supporting a non-

24 hierarchical view of face processing. Face “recognition” (familiar versus unfamiliar faces)  
25 modulated connections between EVC and OFA/FFA, particularly in the left hemisphere.  
26 Most importantly, immediate and delayed repetition of stimuli were also best captured by  
27 modulations of connections between EVC and OFA/FFA, but not self-connections of  
28 OFA/FFA, consistent with synchronization or predictive coding theories.

29

## 30 **Keywords**

31 Repetition suppression, Dynamic Causal Modelling (DCM), Face perception,  
32 Synchronization, Predictive coding

33

## 34 **1 Introduction**

35 Repetition suppression (RS) refers to decreased neural responses produced by repeated  
36 exposures to stimuli. RS is observed in human studies using functional magnetic resonance  
37 imaging (fMRI; for review, see Grill-Spector et al., 2006) and has been associated with the  
38 behavioural phenomenon of “priming”, i.e., faster and/or more accurate responses to  
39 repeated stimuli. RS has also been used as a tool to infer functional characteristics of neural  
40 populations, particularly in sensory regions (also called “fMRI adaptation”, Grill-Spector &  
41 Malach, 2001; Larsson et al., 2016). For example, two regions in the ventral visual stream -  
42 the bilateral fusiform face area (FFA) and the occipital face area (OFA) - consistently show  
43 RS to repeated presentations of the same faces (Henson, 2016).

### 44 **1.1 Neural theories of Repetition Suppression**

45 As described below, four main theories have been developed to account for RS: Fatigue,  
46 Sharpening, Synchronization and Predictive coding (Grill-Spector et al., 2006; Wiggs &

47 Martin, 1998; Gotts et al., 2012; Henson, 2016). Although these theories have focused on  
48 different features of repetition effects, the aim of the present study was to test their  
49 predictions in terms of effective connectivity between face-responsive regions. To this end,  
50 we applied dynamic causal modeling (DCM, Friston et al., 2003) on a publically available  
51 fMRI dataset that includes initial and repeated presentations of familiar, unfamiliar and  
52 scrambled faces (Wakeman & Henson, 2015). DCM is a Bayesian framework for comparing  
53 models with specified connectivity within a network of regions of interest (ROIs). It  
54 incorporates a generative model of fMRI data, in which connections are represented by three  
55 ROI-by-ROI matrices of parameters: the A matrix represents the fixed (or endogenous)  
56 directional connections from one ROI to another; one or more B matrices represent the  
57 modulation of the corresponding endogenous connections due to one or more experimental  
58 manipulations (e.g., each type of stimulus); and the C matrix is the direct (or exogenous)  
59 input to one or more ROIs for one or more experimental manipulations. The dynamics (fMRI  
60 timeseries) of the ROIs are then modelled using 1) a parameterized differential equation that  
61 expresses the rate of change of neural activity in each ROI as a function of the level of  
62 activity in every connected ROI, triggered by the timing of each exogenous input; and 2) a  
63 haemodynamic model that transforms the predicted neural activity into the fMRI BOLD  
64 signal, with a small number of haemodynamic parameters than can vary across ROIs. When  
65 applying DCM to RS paradigms, the C matrix can code all stimuli, whereas the B matrix can  
66 code for the difference between initial and repeated presentations of stimuli (for further  
67 details about DCM, see Methods).

68       Of the four theories of RS mentioned above, the first two emphasize changes within an  
69 ROI, which is captured in DCM by the self-connections (diagonal terms of A and B matrices).  
70 These are constrained to be negative to ensure the network dynamics are stable (i.e., activity  
71 eventually returns to zero at some time after an exogenous input). According to the Fatigue

72 theory (Li et al., 1993; McMahon & Olson, 2007), it is the neurons that are most selective  
73 for a stimulus (and therefore show the greatest firing to that stimulus) that show greatest  
74 reduction in firing when that stimulus is repeated. This pattern has been observed in early  
75 visual cortex (Avidan et al., 2002), and may underlie some forms of perceptual adaptation  
76 (e.g., Grill-Spector et al., 1999). The mechanism underlying the fatigue could be firing-rate  
77 adaptation or synaptic depression (Grill-Spector et al., 2006). If these mechanisms operate  
78 primarily within an ROI (see Discussion), then in the DCM framework, they would be  
79 captured by changes in the self-connections.

80 The Sharpening theory (Wiggs & Martin, 1998) also offers a “within-region”  
81 perspective, but makes the opposite neural predictions to fatigue theory: i.e., it is the less  
82 selective neurons whose firing is reduced (as opposed to the most selective), resulting in a  
83 sparser distribution of firing. The mechanisms of sharpening might include strengthening of  
84 inhibitory, lateral connections between neurons. Consistent with the sharpening model, Jiang  
85 et al. (2006, 2007) found that perceptual training sharpens the tuning of neurons. At a  
86 population-level measured by fMRI (i.e., when averaging over many neurons within an ROI),  
87 because there tend to be more non-selective than selective neurons, the mean firing rate  
88 decreases (causing RS). This would again be apparent in DCM by changes in the self-  
89 connections of the B matrix, e.g., increased self-inhibition, indistinguishable from Fatigue  
90 theory.

91 The remaining two theories assume that RS also arises from connections between  
92 regions. The Synchronization theory of Gotts et al. (2012) proposes that repetition leads to  
93 increased synchronization of neural activity across regions, such that greater communication  
94 can be achieved despite lower mean firing rates. The reduced firing rates cause RS, while  
95 the increased synchrony causes more efficient neural processing and hence behavioural  
96 effects like priming (Ghuman et al., 2008). This increased neural synchrony is likely to be

97 associated with stronger effective connectivity between regions, corresponding to off-  
98 diagonal elements in DCM's B matrix.

99 Finally, the Predictive Coding theory (Friston, 2005; Henson, 2016) suggests that RS is  
100 associated with changes in effective connectivity between regions, as well as within a region.  
101 This theory proposes that neurons at one level of a hierarchy receive predictions from higher  
102 levels, and feed forward the difference (i.e., prediction error) between these predictions and  
103 the input from levels below. When a stimulus has been processed before, the predictions are  
104 improved, and therefore the prediction error is reduced. A single ROI (as resolved by  
105 standard fMRI) is assumed to contain neurons receiving predictions from the level above,  
106 neurons receiving prediction errors from the level below, and neurons sending the resulting  
107 prediction error to the level above (even if these neurons are in different layers of cortex;  
108 Friston, 2005). However, assuming that the fMRI signal is dominated by the feedforward  
109 neurons whose firing codes prediction error (Egner et al., 2010), the mean fMRI response  
110 will be reduced by repetition. Though the mapping from neural interactions to fMRI effective  
111 connectivity is not simple (see Discussion), the improved predictions might be expected to  
112 affect backward connections in DCM (e.g., from FFA to OFA), while the reduced prediction  
113 errors fed forward might be expected to affect forward connections (e.g., from OFA to FFA).

114 A previous study of Ewbank et al. (2013) used DCM to investigate effects of face  
115 repetition (within and across changes in the size of images), and found evidence that  
116 repetition modulated connections from right OFA to right FFA, supporting the  
117 synchronization/predictive coding account. However, the RS data in that study came from a  
118 blocked fMRI design, comparing blocks in which the same face was shown multiple times  
119 against blocks in which a new face was shown in each trial. This blocking means that  
120 participants can expect whether or not the next stimulus is a repeat, which is also known to  
121 reduce the fMRI response (Summerfield et al., 2008; also called "expectation suppression",

122 Grotheer & Kovács, 2015). In the present data, initial and repeated trials were pseudo-  
123 randomly intermixed, dramatically reducing the ability to accurately expect the next stimulus  
124 type. Furthermore, the repetition in the Ewbank et al.'s DCM studies was always immediate  
125 (i.e., no intervening stimulus), yet the lag between initial and repeated presentations may  
126 affect the mechanisms of RS (e.g., immediate repetition may engage fatigue to a greater  
127 extent than longer-lag repetition; see Epstein et al., 2008; Henson, 2016). In the present data,  
128 there were also delayed repetitions (with several intervening faces), which allowed testing  
129 of whether the effects of repetition on connectivity differ by repetition lag. Finally, Ewbank  
130 et al. (2013) only included 2 ROIs in their DCM: the OFA and FFA in the right hemisphere.  
131 While this allowed testing of whether repetition affects forward, backward and/or self-  
132 connections, it did not allow for the possibility that repetition already affects the input to  
133 these regions, e.g., in the forward connectivity from earlier regions in a processing stream,  
134 such as early visual cortex (EVC), which limited the ability to test some specific theories of  
135 face processing (see below). Moreover, because the DCM only included ROIs in the right  
136 hemisphere, it did not allow testing of whether the same repetition effects occur in the left  
137 hemisphere. Notably, though face-related OFA and FFA activations in fMRI are often  
138 stronger/more selective in the right hemisphere, paralleling suggestions from brain lesions  
139 that the right hemisphere is specialized for face processing (Ishai et al., 2005; Rossion, 2018),  
140 similar face-related activations are found in the left hemisphere. We addressed these issues  
141 by comparing a “2-ROI” network in each hemisphere separately (as in Ewbank et al., 2013),  
142 with a “3-ROI” network that also included EVC in each hemisphere, and a “6-ROI” network  
143 that included bilateral EVC, OFA and FFA ROIs.

## 144 **1.2 Network theories of Face Processing**

145 Finally, though we have focused on repetition effects, our DCM models also allowed

146 testing of other hypotheses associated with face processing. Firstly, we have assumed above  
147 (e.g., in the discussion of forward and backward connections according to the Predictive  
148 Coding theory) that FFA sits “higher” than the OFA in a face processing hierarchy, as  
149 common in theories of face processing (Haxby et al., 2000; Fairhall & Ishai, 2007). However,  
150 Rossion and colleagues have suggested that information may flow from EVC to FFA first,  
151 and then back from FFA to OFA. This is based on neuroimaging findings from patients with  
152 OFA lesions, who still show face-related activation in FFA in the same hemisphere (Rossion  
153 et al., 2003; Gentile et al., 2017; Steeves et al., 2009). This suggests a direct connection from  
154 EVC to FFA that does not go via OFA (or else input from the contralateral FFA), meaning  
155 there is not a strict, sequential hierarchy from EVC to OFA to FFA.

156 The first DCM study of face processing (Fairhall & Ishai, 2007) found that face  
157 perception modulated connections from OFA to FFA, favouring the conventional  
158 feedforward, hierarchical view. A more recent meta-analysis of four DCM fMRI experiments  
159 (Kessler et al., 2021) replicated the increased “forward” connectivity from OFA to FFA for  
160 faces, but also found more negative “backward” connectivity from FFA to OFA. However,  
161 neither of these studies allowed for input from EVC to both ROIs, which would allow, for  
162 example, face-related input to FFA that bypasses OFA, as suggested by the patient fMRI data  
163 of Rossion and colleagues. Nor did either study allow modulations of self-connections by  
164 faces, nor modulation of connections between the two hemispheres. A study by Frässle et al.  
165 (2016) tested DCMs that connected OFA and FFA in both hemispheres, as well as input from  
166 left and right EVC. Their findings highlighted the role of interhemispheric integration  
167 between bilateral OFA in face perception, in addition to feedforward modulations from EVC  
168 to OFA and then FFA. However, they did not allow the direct connections between EVC and  
169 FFA suggested by Rossion and colleagues (nor allow modulation of self-connections). We  
170 therefore revisited this question in the present dataset, operationalizing face “perception” by

171 contrasting faces with scrambled faces, and adding another “B” matrix to capture modulation  
172 of connections by face perception. By allowing the connections from EVC to be modulated  
173 by both faces and by repetition, we could test alternative hypotheses that face-related  
174 activation and RS respectively already arrive in the input to OFA and/or FFA, through altered  
175 synaptic weights from earlier visual regions.

176 Finally, there is also debate around the role of FFA and OFA in face recognition, as  
177 operationalized in the present dataset by contrasting familiar faces (known to participants)  
178 with unfamiliar faces (see also Henson et al., 2003). While impairments of face  
179 recognition/identification, despite intact face perception, are more often associated with  
180 lesions to more anterior temporal lobe (ATL) regions (Damasio et al., 1990; Gainotti &  
181 Marra, 2011), neuroimaging studies sometimes show additional activation of FFA for  
182 familiar than unfamiliar faces (Henson et al., 2003). While this familiarity-related activation  
183 could reflect feedback from ATL, we did not include an ATL ROI in the present DCMs  
184 because no such region showed any differential activity in the whole-brain contrasts,  
185 possibly because of susceptibility-related fMRI signal dropout in this dataset. Nonetheless,  
186 we could at least test whether familiarity effects reflected local effects (self-connections),  
187 connectivity from OFA to FFA, or between left and right hemispheres for example.

### 188 **1.3 Methodological Advancements**

189 The previous meta-analysis by Kessler et al. (2021) made inferences about individual  
190 parameters (connections) in their DCM models of a face network. However, this parameter-  
191 level inference ignores potential covariances between the posterior estimates of those  
192 parameters, which limits their reproducibility and interpretability (Rowe et al., 2010). Here,  
193 we focused on model-level inference, which accommodates covariances between all  
194 parameters. To address our hypotheses, we performed binary comparisons of two families



195 of models that differed in a certain type of connection, such as models with versus without  
196 modulation of self-connections by repetition, for example, or models with versus without  
197 modulation of forward connections from ECV to FFA by face perception. More specifically,  
198 we compared families in terms of the free energy approximation to their model evidences,  
199 converted to a posterior probability of one family being more likely than the other (where a  
200 probability of 95% was taken to be sufficient evidence to favour one family).

201 Furthermore, we employed recent developments in group DCM modelling, using a  
202 Parametric Empirical Bayes (PEB) approach (Friston et al., 2015). By creating a hierarchical  
203 model, empirical priors at the group level shrink the parameter estimates for individual  
204 participants toward those associated with the global maximum of the model evidence. This  
205 finesses problems due to local minima inherent in the inversion of nonlinear and ill-posed  
206 DCM models, thereby providing more robust and efficient estimates.

207 To summarise, the main purpose of this study was to examine critical hypotheses in  
208 terms of connectivity arising from the four theories of RS: fatigue, sharpening,  
209 synchronization and predictive coding. If repetition modulates within-region connectivity  
210 (self-modulations in DCM's B matrix), this is consistent with the fatigue and sharpening  
211 models. If repetition modulates between-region connections (forward or backward  
212 modulations in DCM's B matrix), this is consistent with synchronization and predictive  
213 coding models. Note also that these theories are not mutually exclusive - for instance,  
214 predictive coding may induce neural sharpening, causing changes both between and within  
215 regions. Furthermore, we took the opportunity to revisit questions about the functional  
216 architecture of face perception and face recognition, given that the dataset included repetition  
217 of unfamiliar faces, famous faces and scrambled faces.

218

## 219 **2 Materials and Methods**

## 220           **2.1 Dataset**

221           The multi-modal (MRI, EEG, MEG) human neuroimaging dataset is available on  
222           OpenfMRI (<https://www.openfmri.org/dataset/ds000117/>; Wakeman & Henson, 2015). It  
223           consists of 19 participants with an age range of 23–37 years (note that this is a superset of  
224           the participants available on OpenNeuro, <https://openneuro.org/datasets/ds000117/>).  
225           Eighteen participants were included after removing one participant whose debriefing showed  
226           they did not recognize any famous faces in one run.

227           During each of the 9 runs, participants made left-right symmetry judgments to randomly  
228           presented images of 16 unique faces from famous people, 16 unique faces from nonfamous  
229           people (unfamiliar to participant), and 16 phase-scrambled versions of the faces. Half of the  
230           stimuli repeated immediately, and the other half repeated after delays of 5-15 stimuli  
231           intervals. We used debriefing data to re-define familiarity of each face for each participant  
232           (i.e., reclassifying famous faces they did not know as “unfamiliar” and reclassifying  
233           nonfamous faces they said they knew as “familiar”, even though latter was rare).

234           The MRI data were acquired with a 3T Siemens Tim-Trio MRI scanner (Siemens,  
235           Erlangen, Germany). The fMRI data came from a gradient echo-planar imaging (EPI)  
236           sequence, with TR of 2000 ms, TE of 30 ms and flip angle of 78°. A T1-weighted structural  
237           image of  $1 \times 1 \times 1$  mm resolution was also acquired using a MPRAGE sequence (for more  
238           details, see Wakeman & Henson, 2015).

## 239           **2.2 fMRI analysis and ROI selection**

240           The fMRI data were pre-processed using the SPM12 software  
241           ([www.fil.ion.ucl.ac.uk/spm](http://www.fil.ion.ucl.ac.uk/spm)). The first two scans were removed from each session to allow  
242           for T1 saturation effects. The Matlab scripts used for all analyses that follow are available  
243           here: [https://github.com/SMScottLee/Face\\_DCM\\_fMRI](https://github.com/SMScottLee/Face_DCM_fMRI). The functional data were realigned

244 to correct for head motion, interpolated across time to the middle slice to correct for the  
245 different slice times, and coregistered with the structural image. The structural image was  
246 segmented and normalized to a standard MNI template, and the normalization warps were  
247 then applied to the functional images, resulting in voxel sizes of  $3 \times 3 \times 3$  mm. These were  
248 finally spatially smoothed using a Gaussian filter of 8 mm FWHM for mass univariate  
249 statistics.

250 After preprocessing, fMRI data were analyzed in a two-stage approximation to a mixed-  
251 effects model. In the first stage, neural activity was modeled by a delta function at stimulus  
252 onset. The BOLD response was modeled by a convolution of these delta functions by a  
253 canonical haemodynamic response function. The resulting time courses were downsampled  
254 at the midpoint of each scan to form regressors in a General Linear Model (GLM). The  
255 experiment crossed two factors. The first factor was repetition (initial stimulus, immediately  
256 repeated or delayed repeated) and the second factor was the type of stimulus (familiar face,  
257 unfamiliar face or scrambled face). Each test session therefore contained 9 regressors of  
258 interest: initial familiar face, immediately repeated familiar face, delayed repeated familiar  
259 face, initial unfamiliar face, immediately repeated unfamiliar face, delayed repeated  
260 unfamiliar face, initial scrambled face, immediately repeated scrambled face, and delayed  
261 repeated scrambled face. To capture face processing effects and to guide ROI selection (see  
262 below), 4 contrasts were predefined: “face perception” was operationalised by contrasting  
263 all faces versus scrambled faces; “immediate repetition” was operationalised by contrasting  
264 all initial presentations (faces and scrambled faces) versus immediate repeats; “delayed  
265 repetition” was operationalised by contrasting all initial presentations versus delayed repeats;  
266 “face recognition” was operationalised by contrasting all familiar faces versus unfamiliar  
267 faces. In addition, 5 interactions between these contrasts were tested (e.g., whether  
268 immediate repetition effects were bigger for faces than scrambled faces).

269 The group-level, family-wise error-corrected ( $p < .05$ ) results showed greater BOLD  
270 response to faces than scrambled faces (averaged across initial and repeated presentations)  
271 in bilateral occipital face area (OFA) and fusiform face area (FFA), plus a cluster in left  
272 orbitofrontal cortex.

273 While superior temporal sulcus (STS) is often associated with face processing (Babo-  
274 Rebelo et al., 2022; Haxby et al., 2000) and has been included in some previous DCM  
275 analyses (Fairhall & Ishai, 2007; Kessler et al., 2021), we did not find it in our group-level  
276 univariate results and so did not include it in the present analysis. However it should be kept  
277 in mind that some of the present effects in OFA and/or FFA could emerge from interactions  
278 with STS (or other regions like ATL; see Introduction), which could be investigated in future  
279 studies.

280 To allow for some individual variability in the location of OFA and FFA, and maximize  
281 their SNR, these ROIs were defined by the contrast of faces > scrambled, uncorrected  $p < .05$ ,  
282 for each subject, but masked with a 10-mm sphere located at the group-result peak (right  
283 OFA [ $x = +39, y = -82, z = -10$ ], left OFA [ $x = -36, y = -85, z = -13$ ], right FFA [ $x = +42, y$   
284  $= -46, z = -19$ ], left FFA [ $x = -39, y = -49, z = -22$ ]) in order to constrain within anatomically-  
285 similar areas (Supplementary Figure 1). Because the contrast of all trials > baseline activated  
286 most of the occipitotemporal cortex (and the stimuli straddled both visual hemifields), the  
287 present data did not enable selection of distinct clusters for EVC. Therefore, ROIs for right  
288 and left EVC were defined by the contrast of left > right and right > left hemifield input from  
289 a previous study (Henson & Mouchlianitis, 2007), and masked with subject-specific  
290 contrasts of all trials > baseline in the present data, again to maximize SNR. The number of  
291 voxels per ROI ranged across participants from 140-178 for rEVC, 47-151 for rOFA and 5-  
292 157 for rFFA; 86-112 for lEVC, 12-143 for lOFA and 3-167 for lFFA.

293 The first singular vector of the fMRI timeseries across voxels was extracted from these

294 ROIs, and the same GLM described above re-fitted. Planned comparisons on the resulting  
295 parameter estimates were then tested (Table 1). OFA and FFA showed face-related activation  
296 (since they were defined this way), though EVC (defined from independent data) showed  
297 de-activation, i.e., greater activation for scrambled faces. The latter might reflect low-level  
298 differences in visual complexity, despite the phase-scrambling's preservation of the 2D  
299 spatial power spectrum, or could reflect suppression of low-level features that are predicted  
300 by a higher-level percept (Murray & Wojciulik, 2004). All six ROIs showed significant RS  
301 for both immediate and delayed repetition, and greater RS for immediate than delayed  
302 repetition. Bilateral FFA also showed significant effects of recognition (greater activation  
303 for familiar than unfamiliar faces). Left EVC and right OFA also showed recognition effects,  
304 though would be unlikely to survive correction for the multiple comparisons performed.

305       The only interaction reaching significance was between face perception and immediate  
306 repetition in left OFA. No other interactions between perception and repetition, or between  
307 recognition and repetition, were significant in any ROI. The lack of interactions was  
308 somewhat surprising, in that we expected RS in OFA and FFA to be greater for familiar than  
309 unfamiliar faces, and for faces than for scrambled faces (Henson & Rugg, 2003), but this  
310 may be because the repetition lags were shorter than used previously (Henson, 2016).

311

| ROI                                           | Var. Explain | Perception         | Imm Rep | Del Rep | Recognition       | Imm vs Delay Rep | Perception × Imm Rep | Perception × Del Rep | Imm Rep × Recognition | Del Rep × Recognition |
|-----------------------------------------------|--------------|--------------------|---------|---------|-------------------|------------------|----------------------|----------------------|-----------------------|-----------------------|
| <b>Original data</b>                          |              |                    |         |         |                   |                  |                      |                      |                       |                       |
| rEVC                                          |              | -3.08*             | 3.87*   | 3.75*   | 0.83              | 3.40*            | -1.31                | -0.27                | -1.35                 | 0.44                  |
| IEVC                                          |              | -2.02              | 5.02*   | 5.43*   | 2.47*             | 4.37*            | -1.47                | -0.22                | 0.57                  | 0.59                  |
| rOFA                                          |              | 13.38*             | 4.06*   | 3.22*   | 2.60*             | 3.11*            | 0.70                 | -0.43                | -0.84                 | 0.43                  |
| IOFA                                          |              | 13.25*             | 3.77*   | 4.04*   | 1.83              | 3.98*            | 2.58*                | 0.29                 | 0.70                  | 1.69                  |
| rFFA                                          |              | 10.94*             | 6.32*   | 4.54*   | 5.34*             | 5.04*            | 1.38                 | 0.05                 | -0.44                 | 0.46                  |
| IFFA                                          |              | 11.47*             | 4.93*   | 3.04*   | 5.04*             | 3.76*            | 1.71                 | -0.08                | -0.65                 | 0.53                  |
| <b>2-ROI network of right hemisphere</b>      |              |                    |         |         |                   |                  |                      |                      |                       |                       |
| rOFA                                          | (29%)        | 9.69*              | 4.22*   | 2.85*   | 2.52*             | 3.33*            | 0.46                 | 2.12**a              | -0.84                 | 0.60                  |
| rFFA                                          | (20%)        | 9.23*              | 6.51*   | 5.29*   | 3.68*             | 6.30*            | 2.94**a              | 4.12**a              | -0.80                 | -1.16                 |
| <b>3-ROI network of right hemisphere</b>      |              |                    |         |         |                   |                  |                      |                      |                       |                       |
| rEVC                                          | (17%)        | -0.75 <sup>a</sup> | 2.97*   | 5.86*   | 0.90              | 3.71*            | 1.20                 | 0.65                 | -0.30                 | -1.13                 |
| rOFA                                          | (35%)        | 8.30*              | 4.90*   | 3.51*   | 4.22*             | 3.93*            | 0.50                 | 1.05                 | -0.28                 | 0.87                  |
| rFFA                                          | (28%)        | 8.46*              | 5.08*   | 4.31*   | 3.90*             | 4.43*            | 0.69                 | 0.85                 | -1.41                 | 0.03                  |
| <b>6-ROI network of bilateral hemispheres</b> |              |                    |         |         |                   |                  |                      |                      |                       |                       |
| rEVC                                          | (16%)        | 0.83 <sup>a</sup>  | 4.70*   | 4.23*   | 2.34**a           | 4.19*            | 0.49                 | -1.51                | -0.55                 | 1.01                  |
| IEVC                                          | (18%)        | 0.02               | 5.62*   | 4.97*   | 1.42 <sup>a</sup> | 5.13*            | 0.77                 | -1.13                | -0.42                 | 1.26                  |
| rOFA                                          | (34%)        | 8.03*              | 5.19*   | 3.41*   | 4.67*             | 4.05*            | 0.40                 | -0.15                | -0.49                 | 0.83                  |
| IOFA                                          | (29%)        | 8.72*              | 5.37*   | 3.43*   | 4.87**a           | 3.92*            | 0.42 <sup>a</sup>    | -0.17                | -0.33                 | 1.21                  |
| rFFA                                          | (25%)        | 8.05*              | 5.77*   | 4.42*   | 4.30*             | 4.70*            | 0.50                 | -0.11                | -0.42                 | 1.23                  |
| IFFA                                          | (22%)        | 7.75*              | 5.84*   | 4.20*   | 4.40*             | 4.40*            | -0.52                | -0.56                | -0.73                 | 1.54                  |

313 *Table 1. T-values for the effects of face perception, immediate repetition (Imm Rep), delayed*  
314 *repetition (Del Rep), face recognition, and their interactions on original data from 6 ROIs*  
315 *and on fitted data in 2-, 3- and 6-ROI networks. Note that the T-values for the “Perception”*  
316 *effect in OFA and FFA are biased by prior selection of the voxels in a whole-brain search;*  
317 *the remaining effects are unbiased since orthogonal contrasts. Positive T-values mean*  
318 *greater activation for faces than scrambled for the perception contrast (i.e, negative T-values*  
319 *mean in EVC greater activation for scrambled than intact faces), greater activation for*  
320 *initial than repeated presentations for the repetition contrasts (i.e, RS) and greater activation*  
321 *for familiar than unfamiliar faces for the recognition contrast. Second column shows mean*  
322 *percentage across participants of variance in fMRI timeseries explained by DCM in each*  
323 *ROI. \* $p < .05$ , two-tailed t-test.*

324

325       Given the lack of interactions, for the DCM B matrices, we only modelled the four  
326 experimental effects that significantly modulated activation in at least two ROIs. These were  
327 the main effects of “face perception” (contrast vector = [1 1 1 1 1 1 0 0 0]), where order of  
328 conditions as above), “immediate repetition” (contrast vector = [0 1 0 0 1 0 0 1 0]), “delayed  
329 repetition” (contrast vector = [0 0 1 0 0 1 0 0 1]) and “face recognition” (of familiar faces;  
330 contrast vector = [1 1 1 0 0 0 0 0 0]). For the driving input in the DCM C matrix, we used  
331 the common effect of all stimuli versus inter-stimulus baseline (“all stimuli”, contrast vector  
332 = [1 1 1 1 1 1 1 1 1]).

### 333       **2.3 Dynamic Causal Modelling (DCM)**

334       The neural dynamics in DCM for fMRI data are represented by the first-order  
335 differential equation (Friston et al., 2003):

$$336 \quad \frac{dz}{dt} = \left( A + \sum_{j=1}^m u_j(t) B^{(j)} \right) z(t) + Cu(t)$$

337       The vector  $z(t)$  represents the neural activity in each of the  $n$  ROIs at time  $t$ . The  $n \times n$   
338 matrices  $\mathbf{A}$  and  $\mathbf{B}^{(j)}$  are directional connectivity matrices, where the value in row  $r$  and  
339 column  $c$  represents the connection strength from ROI  $c$  to ROI  $r$  (where 0 = no connection  
340 present). The  $\mathbf{A}$  matrix captures the fixed (or endogenous) connections, whereas  $\mathbf{B}^{(j)}$  is a  
341 modulation on one or more of these connections due to the  $j$ th experimental manipulation.  
342 Each  $\mathbf{B}$  matrix is multiplied by experimental input  $u_j(t)$  relating to experimental effects  
343  $j=1..m$  (i.e, one of the four contrasts described above). The  $n \times p$   $\mathbf{C}$  matrix is the influence  
344 of one or more of those experimental inputs to one or more ROIs in the network (here  $p=1$ ,  
345 corresponding to all stimuli versus baseline; as above). All inputs were mean-centred, so the  
346 parameters in the  $\mathbf{A}$  matrix represent the average effective connectivity across conditions.  
347 All connection parameters in  $\mathbf{A}$ ,  $\mathbf{B}$ ,  $\mathbf{C}$  are rate constants with units of Hz. The diagonal  
348 elements of the  $\mathbf{A}$  and  $\mathbf{B}$  matrices (self-connections and modulations on self-connections  
349 respectively) are always negative (inhibitory), so that the dynamics of the system settles back  
350 to baseline after stimulation. These self-connections are log scaling parameters that scale the  
351 default value of -0.5 Hz, i.e. total self-connection =  $-0.5 \times \exp(A_{ii} + B_{ii})$ . DCM includes  
352 “shrinkage” priors on all connections, so their expected value is 0 unless the data requires  
353 otherwise.

354       The neural activity in each ROI is then transformed into the modelled fMRI BOLD  
355 signal using a nonlinear haemodynamic model with three main parameters (for more details,  
356 see Stephan et al., 2007). These parameters have tight empirical priors, but can differ  
357 between ROIs in order to capture different neurovascular coupling across the brain and  
358 across individuals. The combined neural and haemodynamic parameters are estimated by  
359 fitting the fMRI data from all ROIs using an iterative scheme that maximizes the free energy



360 bound on the Bayesian model evidence, which offers a balance between explaining the data  
361 and minimizing model complexity.

362 In more detail, we used a recent extension of DCM to fit multi-subject data using  
363 Parametric Empirical Bayes (PEB). PEB introduced a general linear model (GLM) that  
364 encodes between-participant effects on the DCM parameters (Zeidman et al., 2019).  
365 Together, the within-participant DCMs and the group-level GLM form a Bayesian  
366 hierarchical model. This can be used in an iterative fashion to “rescue” subjects who fall into  
367 local optima, by estimating the group-average connectivity parameters, then using these  
368 parameters to form *empirical priors* for the within-participant DCMs. The DCMs are then  
369 re-estimated with these empirical priors, and the process repeats (Friston et al., 2015). We  
370 used this iterative fitting, applied to the A and B connections only, with a single covariance  
371 component to quantify between-participant variability, since preliminary analyses showed  
372 that this produced the highest free-energy approximation to the model evidence (except for  
373 the 2 ROI model, where we also applied PEB to the C connection, so as to be able to test  
374 models differing in the input ROI). We estimated the “full” PEB model (with all possible  
375 connections of interest), before applying Bayesian Model Comparison (BMC) to make  
376 inferences about sets of parameters (e.g., “self” vs “between-region”, or “forward” vs  
377 “backward” connections), by grouping PEB models into two ‘families’ (for a given  
378 hypothesis) and pooling evidence within each family.

## 379 **2.4 DCM networks**

380 Three sets of networks were estimated (see Figure 1), starting from a simple 2-ROI  
381 OFA + FFA network in the right hemisphere, to mimic prior analysis by Ewbank et al. (2013),  
382 and given prior evidence that the right hemisphere is particularly involved in face processing  
383 (Ishai et al., 2005; Rossion, 2018). We then added a third ROI (right EVC) to form a 3-ROI

384 network, to allow for the important possibility that effects of repetition, face perception  
385 and/or face recognition already arise in the inputs to OFA and FFA (see Introduction). Finally,  
386 we modelled a bilateral network with 3 ROIs per hemisphere, and connections between  
387 homologous OFA and FFA, to allow for possible inter-hemisphere modulations, as proposed  
388 by Frässle et al. (2016). The 2-ROI and 3-ROI networks in the left hemisphere were also  
389 estimated and shown as supplementary results, to allow comparison with the results from  
390 the right hemisphere.

#### 391 **2.4.1 2-ROI network**

392 In the 2-ROI network, all possible connections were included, i.e., four endogenous  
393 connections (in a  $2 \times 2$  **A** matrix) representing the average connectivity for OFA-self, FFA-  
394 self, OFA-to-FFA, and FFA-to-OFA. All four of these connections were allowed to be  
395 modulated by each of the four experimental effects (the four,  $2 \times 2$  **B** matrices), i.e., face  
396 perception, immediate repetition, delayed repetition and face recognition. Importantly  
397 (compared to 3-ROI network below), the driving input (**C** matrix) for all stimuli entered into  
398 both OFA and FFA. After fitting this model to all participants using PEB, we tested a priori  
399 hypotheses using BMC.

400 Foremost, we tested for each of the four modulatory effects: 1) whether self-  
401 modulations are needed, by grouping all 16 models into two families based on whether a  
402 model has an OFA-self and/or an FFA-self modulation, and 2) whether any between-region  
403 modulation was needed, depending on whether the OFA-to-FFA and/or FFA-to-OFA  
404 connection was present. If evidence was found for modulation of self- or between-region  
405 modulation, further binary BMC was used to test individual self-connections and individual  
406 directions of between-region connections (e.g., OFA to FFA, or FFA to OFA).

407 Secondly, we tested whether the input was needed to one or both of OFA and FFA. In a  
408 strict version of the standard hierarchical model, input enters the OFA before being passed

409 on to FFA. However, given Rossion et al.'s work (Rossion, 2008; Rossion et al., 2003; see  
410 Introduction), we compared this model to models in which input was to FFA instead, or both  
411 OFA and FFA.

#### 412 **2.4.2 3-ROI network**

413 In the 3-ROI network, all possible nine connections were also included in the A and B  
414 matrices, but now the driving input (C matrix) was restricted to only enter through the EVC  
415 ROI, to capture the expected flow of visual information from early to later visual regions. In  
416 principle, this allowed DCM to drop (set to zero) connections from EVC to OFA or FFA,  
417 depending on whether information passes serially through OFA before reaching FFA, or  
418 whether it passes through FFA before OFA (see Introduction), or whether there are direct  
419 routes from EVC to both OFA and FFA. For the family BMC, we conducted 4 family  
420 comparisons: (1) whether self-modulation (self-OFA and/or self-FFA) was needed, (2)  
421 whether modulation between OFA and FFA (OFA-to-FFA and/or FFA-to-OFA) was needed,  
422 (3) whether “forward” modulation (EVC-to-OFA and/or EVC-to-FFA) was needed, and (4)  
423 whether “backward” modulation (OFA-to-EVC and/or FFA-to-EVC) was needed. If any  
424 modulation was found (e.g., between OFA and FFA), we further tested which direction of  
425 connectivity was modulated (e.g., OFA to FFA, or FFA to OFA).

#### 426 **2.4.3 6-ROI network**

427 In the 6-ROI network, the 3-ROI network for the right hemisphere was connected to  
428 the 3-ROI network for the left hemisphere, in order to account for any interhemispheric  
429 integration of face perception (Frässle et al., 2016). More specifically, homologous  
430 connections between left and right OFA and left and right FFA were modelled (no direct  
431 connections between left and right EVC were included). All connections had experimental  
432 modulations. We performed the same family-wise BMC as in the 2- and 3-ROI networks

433 above, as well as a further family BMC to test whether interhemispheric modulation (OFA-  
434 to-OFA and FFA-to-FFA) was needed. Again, if BMC showed at least one of these  
435 connection types was needed (e.g., between left and right FFA), we went further to test which  
436 direction of connectivity was modulated (e.g., left FFA to right FFA, or vice versa).  
437

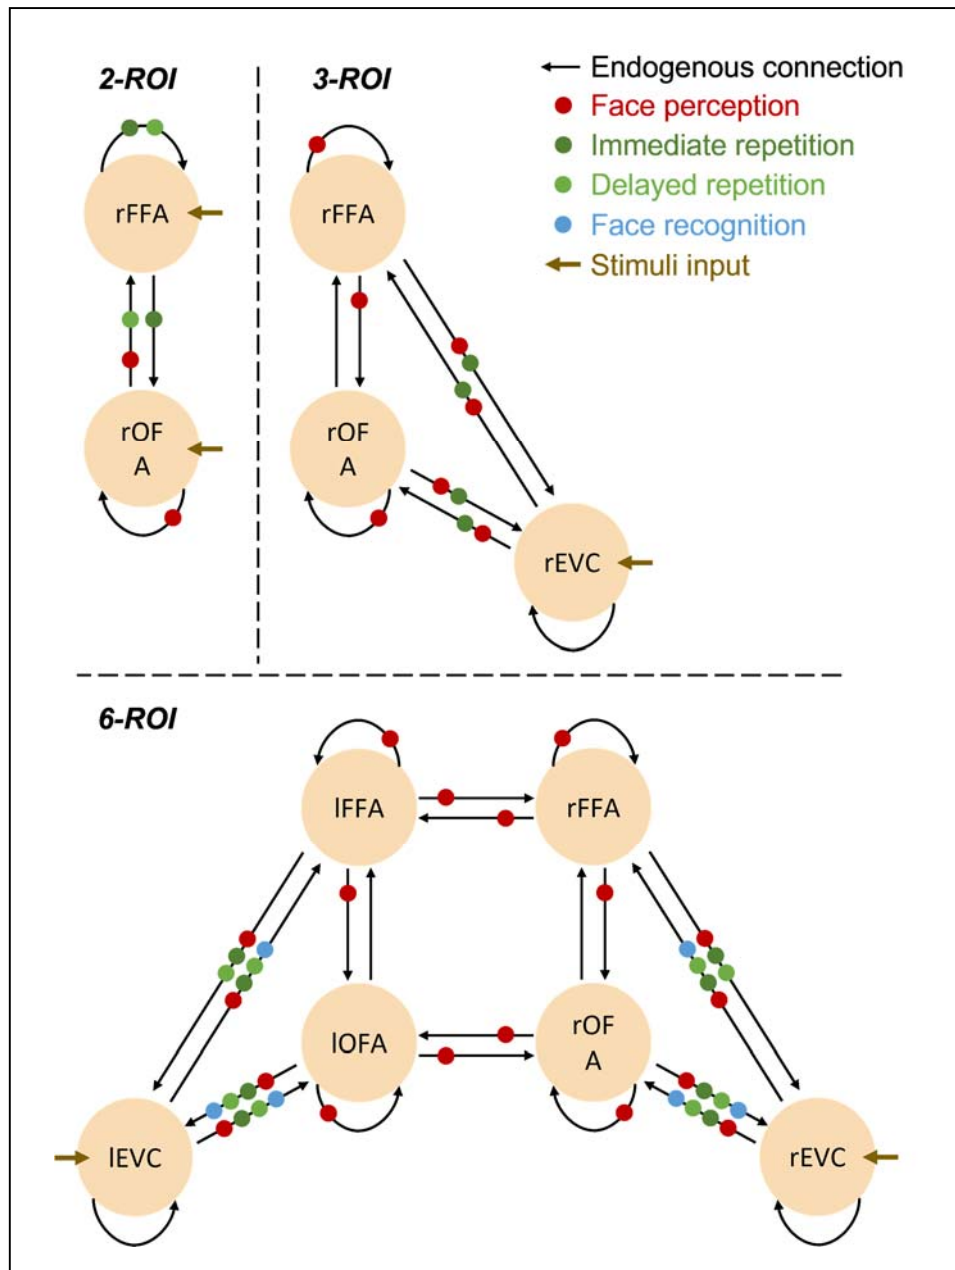

438  
439 *Figure 1. The “full” DCM structures of 2-ROI (top left), 3-ROI (top right) and 6-ROI*  
440 *(bottom) models. Black arrows represent endogenous (i.e., task-independent) connections*

441 *(DCM “A” matrix). Colored dots represent reliable modulations (DCM “B” matrix) inferred*  
442 *from model comparison (see Results). Brown arrows represent driving inputs (DCM “C”*  
443 *matrix).*

444

### 445 **3 Results**

#### 446 **3.1 Univariate Results and Validation of DCM fit**

447 Before reviewing the DCM connectivity parameters, we first validated whether the  
448 various DCMs captured significant effects in the data. First, we examined the proportion of  
449 variance in the original fMRI timeseries explained in each ROI. Averaged across participants,  
450 this ranged from 16% to 35% across ROIs (Table 1), which is generally good for DCM,  
451 given the typical amount of noise in fMRI data (though tended to be lower in EVC, most  
452 likely because this ROI was defined independent of the current data).

453 However, DCM could fit a reasonable percentage of the variance in the fMRI timeseries  
454 by assuming that every stimulus produced an evoked response (versus interstimulus baseline)  
455 of equal amplitude, i.e., without necessarily reproducing the significant differences between  
456 conditions (stimulus-types) that was found in the data. To check the latter, we extracted the  
457 timeseries predicted by DCM, fit the same GLM that was applied to the data timeseries (i.e.,  
458 with a separate regressor for each of the nine conditions) and performed the same T-contrasts  
459 on the resulting parameter estimates that were performed in Table 1. Note that these  
460 parameter estimates are not a perfect reflection of DCM’s predictions, because they assume  
461 a fixed HRF (the canonical HRF used in the GLM), whereas DCM allows the HRF to differ  
462 across participants and ROIs, but the results should be similar nonetheless.

463 Figure 2 presents the parameter estimates from the GLM fit to the original data, and  
464 from the same GLM fit to the timeseries generated by DCM for each of the 2-, 3- and 6-ROI

465 networks; Table 1 lists the T-values of planned comparisons on these parameters from the  
466 DCM fit (cf. the T-values of original data, see the top part of Table 1). In general, the relative  
467 pattern of significant differences across conditions was reproduced in left and right OFA and  
468 FFA by all models, i.e., effects of perception, recognition, immediate repetition, delayed  
469 repetition, and difference between immediate and delayed repetition. However, the 3-ROI  
470 and 6-ROI networks did not reproduce the greater activation for scrambled than intact faces  
471 in right EVC (despite the presence of backward connections from OFA/FFA to EVC). Also,  
472 the effects of perception, immediate repetition, delayed repetition, and difference between  
473 immediate and delayed repetition, were reproduced in all ROIs in left-hemisphere networks,  
474 but a significant effect of recognition was also produced in IOFA (Supplementary Table 1).  
475  
476

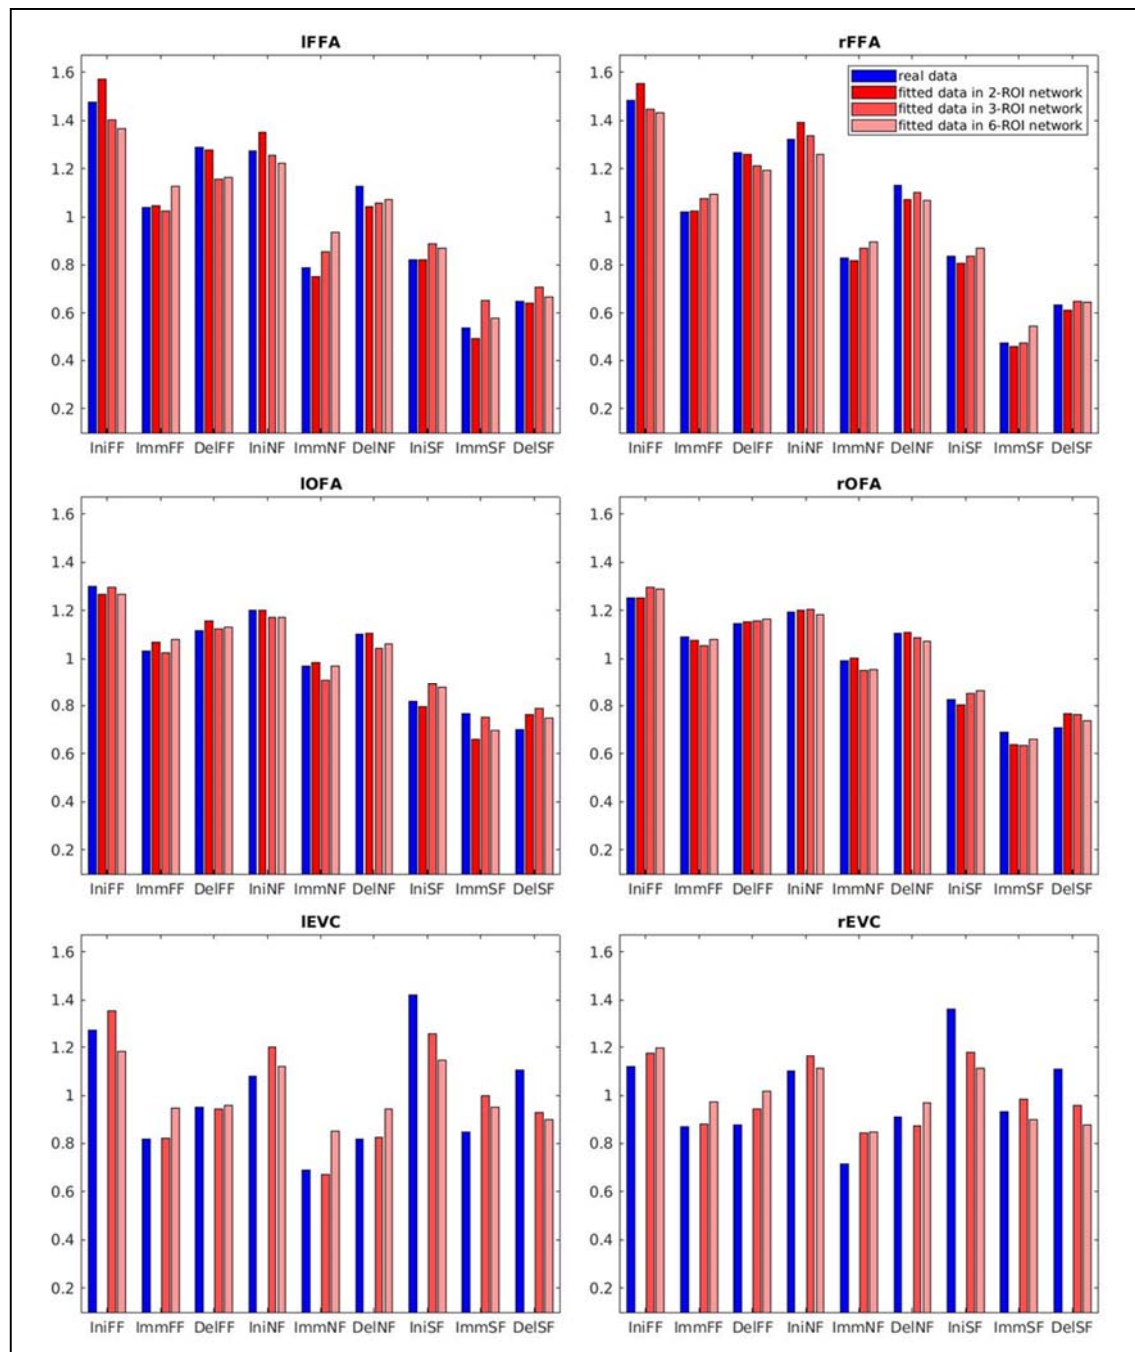

477

478 *Figure 2. Mean GLM parameter estimates from original timeseries (blue) and from*  
 479 *timeseries reconstructed by DCM for 2ROI, 3ROI and 6ROI networks (red shades), for*  
 480 *each ROI (panel) and condition (groups on x-axis). To allow for different scaling factors,*  
 481 *the parameter estimates were re-scaled to have same mean over all conditions. The nine*  
 482 *conditions are initial familiar face (IniFF), immediately repeated familiar face (ImmFF),*  
 483 *delayed repeated familiar face (DelFF), initial unfamiliar face (IniNF), immediately*

484 *repeated unfamiliar face (ImmNF), delayed repeated unfamiliar face (DelNF), initial*  
485 *scrambled face (IniSF), immediately repeated scrambled face (ImmSF), and delayed*  
486 *repeated scrambled face (DelSF).*

487

## 488 **3.2 Connectivity Results**

### 489 **3.2.1 2-ROI network**

490 To address the theories in the Introduction about whether specific types of modulatory  
491 connection were affected by face perception, repetition and recognition, BMC was  
492 performed on pairs of model families with versus without certain connection-types.

493 There was strong evidence (> 95% probability) that face perception modulated both  
494 self-connections of rOFA and/or rFFA, and between-region connections between rOFA and  
495 rFFA (Table 2). Indeed, follow-up tests showed that modulations by faces was needed for  
496 the rOFA self-connection and the connection from rOFA to rFFA.

497 There was strong evidence that immediate and delayed repetition modulated self-  
498 connections of rOFA and/or rFFA, with follow-up tests showing that modulation of rFFA  
499 was critical. There was also evidence that the two types of repetition modulated between-  
500 region connections differently, with immediate repetition modulating the connection from  
501 rFFA to rOFA, and delayed repetition modulating the connection from rOFA to rFFA.

502 There was insufficient evidence to identify which specific connections were modulated  
503 by face recognition in this right hemisphere network.

504

|              | Perception  | Imm Rep     | Del Rep     | Recognition |
|--------------|-------------|-------------|-------------|-------------|
| OFA/FFA-self | <b>1.00</b> | <b>1.00</b> | <b>1.00</b> | 0.68        |
| OFA<->FFA    | <b>1.00</b> | <b>1.00</b> | 0.94        | 0.85        |



|                    |             |             |             |      |
|--------------------|-------------|-------------|-------------|------|
| <i>OFA-self</i>    | <b>1.00</b> | 0.94        | 0.17        | 0.81 |
| <i>FFA-self</i>    | 0.86        | <b>1.00</b> | <b>1.00</b> | 0.32 |
| <i>OFA-&gt;FFA</i> | <b>1.00</b> | 0.22        | <b>0.97</b> | 0.85 |
| <i>OFA&lt;-FFA</i> | 0.14        | <b>1.00</b> | 0.14        | 0.62 |

505 *Table 2. Posterior probabilities for BMC of two families with versus without various types*  
 506 *of connection (rows) for each experimental effect (columns) for the 2-ROI, right hemisphere*  
 507 *network. Values greater than 0.95 are taken as strong evidence (shown in bold emphasis).*

508

509 The results for the left hemisphere DCM were similar (Supplementary Table 2), in that  
 510 face perception affected the IOFA self-connection and the IOFA->IFFA connection, that  
 511 repetition affected the IFFA self-connection, and that delayed repetition modulated the IOFA-  
 512 >IFFA connection (though modulation by immediate repetition could no longer be attributed  
 513 to the IFFA->IOFA connection). Unlike the right hemisphere DCM, face recognition now  
 514 modulated the IOFA->IFFA connection (suggesting that recognition effects were stronger in  
 515 left hemisphere – see later).

516 We also tested whether inputs were needed to just one or both ROIs (C parameters).  
 517 There was compelling evidence (posterior probability close to 1.00) that stimulus-dependent  
 518 input (regardless of stimulus type) was needed to both ROIs, consistent with Rossion et al.  
 519 (2008), and further justifying consideration of the 3-ROI network below.

520 The above results suggest that repetition primarily affects both self-connections and  
 521 between-region connections. However, this assumes that the input to both ROIs not already  
 522 modulated by repetition. Thus in the next model, we added a third ROI, EVC, connected to  
 523 both OFA and FFA, which allowed us to ask whether repetition (and perception/recognition)  
 524 modulated input from EVC to OFA and/or FFA.

525

526 **3.2.2 3-ROI network**

527 There was evidence that all the connections were modulated by face perception, except  
 528 from rOFA to rFFA (Table 3).<sup>1</sup> This included a direct connection from rEVC to rFFA (as  
 529 well as from rEVC to rOFA), consistent with Rossion’s non-hierarchical view. The  
 530 modulations of connections from rOFA and rFFA back to rEVC were probably needed to  
 531 explain the greater activation for scrambled vs intact faces in rEVC (see Univariate Results).  
 532

|                    | <b>Perception</b> | <b>Imm Rep</b> | <b>Del Rep</b> | <b>Recognition</b> |
|--------------------|-------------------|----------------|----------------|--------------------|
| OFA/FFA-self       | <b>1.00</b>       | 0.39           | 0.49           | 0.59               |
| OFA<->FFA          | <b>1.00</b>       | 0.51           | 0.30           | 0.44               |
| EVC->OFA/FFA       | <b>1.00</b>       | <b>1.00</b>    | 0.19           | 0.32               |
| EVC<-OFA/FFA       | <b>1.00</b>       | <b>1.00</b>    | 0.18           | 0.20               |
| <i>OFA-self</i>    | <b>0.99</b>       | 0.52           | 0.55           | 0.35               |
| <i>FFA-self</i>    | <b>1.00</b>       | 0.35           | 0.36           | 0.69               |
| <i>OFA-&gt;FFA</i> | 0.70              | 0.25           | 0.25           | 0.26               |
| <i>OFA&lt;-FFA</i> | <b>1.00</b>       | 0.68           | 0.41           | 0.59               |
| <i>EVC-&gt;OFA</i> | <b>1.00</b>       | <b>0.99</b>    | 0.23           | 0.41               |
| <i>EVC-&gt;FFA</i> | <b>1.00</b>       | <b>1.00</b>    | 0.23           | 0.31               |
| <i>OFA-&gt;EVC</i> | <b>1.00</b>       | <b>1.00</b>    | 0.22           | 0.26               |
| <i>FFA-&gt;EVC</i> | <b>1.00</b>       | <b>1.00</b>    | 0.22           | 0.23               |

533 *Table 3. Posterior probabilities for BMC of two families with versus without various types*  
 534 *of connection (rows) for each experimental effect (columns) for the 3-ROI, right hemisphere*

<sup>1</sup> Because we were only interested in the univariate results for OFA and FFA, we did not distinguish families by self-connections for EVC, even though the DCM model allowed modulation of EVC self-connections.

535 *network. Values greater than 0.95 are taken as strong evidence (shown in bold emphasis).*

536

537 For immediate repetition however, modulations could no longer be attributed to self-  
538 connections of rOFA and rFFA, nor the direct connection between them. Rather, it was the  
539 connections from, and to, EVC that showed evidence of modulation. For delayed repetition,  
540 on the other hand, there were no longer evidence that could uniquely identify the source of  
541 modulation. Like for the 2-ROI right hemisphere network, there was not sufficient evidence  
542 to localise modulations by face recognition either.

543 The results for the left hemisphere DCM (Supplementary Table 3) showed similar  
544 modulations by face perception, except that the IOFA self-connection and IEVC->IFFA  
545 connection no longer showed sufficient evidence. However, family comparison could not  
546 uniquely localise modulation by immediate or delayed repetition. There was however  
547 evidence that face recognition modulated the IOFA self-connection and IFFA->IEVC  
548 connection, again suggesting left lateralisation of this connectivity changes associated with  
549 face recognition.

550 In summary, the effects of face perception on self-connections and connections  
551 between rOFA and rFFA in the 3-ROI network are consistent with the 2-ROI network, but  
552 additionally suggest that faces already start to differ from scrambled faces in the input to  
553 OFA and FFA (a scenario that was not possible to test in the 2-ROI network). This pattern is  
554 more consistent with a non-hierarchical view, where face information is present in a direct  
555 input to FFA (at least in the right hemisphere), rather than conventional hierarchical view in  
556 which face information in FFA only comes via the OFA.

557 On the other hand, the effects of repetition, at least immediate repetition, are different  
558 from the 2-ROI network, in that whereas immediate repetition modulated both self-  
559 connections and between-region connections in the 2-ROI network, it now modulated only

560 the connections between EVC-OFA and EVC-FFA in the 3-ROI network (at least in the right  
 561 hemisphere). This is again because the 2-ROI network does not have the capability to explain  
 562 repetition effects as arising earlier in the visual pathway. This result from the 3-ROI network  
 563 instead favours theories that entail changes in between-region connectivity (e.g.,  
 564 synchronization or predictive coding) rather than local changes within a region RS (e.g.,  
 565 fatigue or sharpening). Further implications of these results are considered in the Discussion,  
 566 after comparing with results from the final 6-ROI network.

567

### 568 3.2.3 6-ROI network

569 The 6-ROI network combines the right and left 3-ROI networks, with additional “inter-  
 570 hemispheric” connections between rOFA and lOFA, and rFFA and lFFA (but not EVC).

571 For face perception, there was evidence that all connections were modulated, except for  
 572 the OFA->FFA connections, in both directions (Table 5), like for the 3-ROI networks above.  
 573 There was also evidence that faces modulated inter-hemispheric connections for OFA and  
 574 FFA in both directions.

575

|                             | <b>Perception</b> | <b>Imm Rep</b> | <b>Del Rep</b> | <b>Recognition</b> |
|-----------------------------|-------------------|----------------|----------------|--------------------|
| <i>OFA/FFA-self, l/r</i>    | <b>1.00</b>       | 0.26           | 0.54           | 0.09               |
| <i>OFA&lt;-&gt;FFA, l/r</i> | <b>0.98</b>       | 0.13           | 0.59           | 0.04               |
| <i>EVC-&gt;OFA/FFA, l/r</i> | <b>1.00</b>       | <b>1.00</b>    | <b>1.00</b>    | <b>1.00</b>        |
| <i>EVC&lt;-OFA/FFA, l/r</i> | <b>1.00</b>       | <b>1.00</b>    | <b>1.00</b>    | 0.90               |
| <i>l&lt;-&gt;r, OFA/FFA</i> | <b>1.00</b>       | 0.03           | 0.04           | 0.06               |
| <i>OFA-self, l/r</i>        | <b>1.00</b>       | 0.44           | 0.75           | 0.15               |
| <i>FFA-self, l/r</i>        | <b>1.00</b>       | 0.09           | 0.11           | 0.11               |

|                         |             |             |             |             |
|-------------------------|-------------|-------------|-------------|-------------|
| <i>EVC-&gt;OFA, l/r</i> | <b>1.00</b> | <b>1.00</b> | <b>1.00</b> | <b>1.00</b> |
| <i>EVC-&gt;FFA, l/r</i> | <b>1.00</b> | <b>1.00</b> | <b>1.00</b> | <b>0.98</b> |
| <i>OFA-&gt;EVC, l/r</i> | <b>1.00</b> | <b>1.00</b> | <b>1.00</b> | <b>0.96</b> |
| <i>FFA-&gt;EVC, l/r</i> | <b>1.00</b> | <b>1.00</b> | <b>1.00</b> | 0.04        |
| <i>OFA-&gt;FFA, l/r</i> | 0.19        | 0.02        | 0.03        | 0.06        |
| <i>FFA-&gt;OFA, l/r</i> | <b>0.99</b> | 0.29        | 0.81        | 0.06        |
| <i>r-&gt;l, OFA/FFA</i> | <b>1.00</b> | 0.07        | 0.02        | 0.10        |
| <i>l-&gt;r, OFA/FFA</i> | <b>1.00</b> | 0.20        | 0.10        | 0.05        |

576 *Table 5. Posterior probabilities for BMC of two families with versus without various types*  
577 *of connection (rows) for each experimental effect (columns) for the 6-ROI, bilateral network.*  
578 *Values greater than 0.95 are taken as strong evidence (shown in bold emphasis).*

579

580 For immediate repetition, there was again compelling evidence for modulation of  
581 connections from, and to, EVC, but no evidence of modulation of self-connections and direct  
582 connections between rOFA and rFFA, as in the 3-ROI, right hemisphere network. There was  
583 no evidence of modulation of inter-hemispheric connections. Unlike the 3-ROI, right  
584 hemisphere network, there was also evidence that delayed repetition modulated the same  
585 connections as immediate repetition, i.e., from EVC to OFA/FFA and vice versa. This might  
586 reflect the doubling in the amount of data being fit.

587 Finally, for face recognition, there was evidence for modulation of EVC-to-OFA and  
588 EVC-to-FFA modulations, as well as OFA-to-EVC. This pattern is unlike the 3-ROI  
589 networks, but may reflect the pooling across both hemispheres (see supplementary Table 3).

590

#### 591 **4 Discussion**

592 In this study, we applied Dynamical Causal Modelling (DCM) with Parametric  
593 Empirical Bayes (PEB) on a publically available fMRI dataset in order to estimate the  
594 effective connectivity within networks including the left and/or right face-sensitive regions  
595 of occipital face area (OFA) and fusiform face area (FFA), plus input from early visual cortex  
596 (EVC), in response to initial and repeated presentations of familiar faces, unfamiliar faces  
597 and scrambled faces. We applied DCM to unilateral 2-ROI and 3-ROI networks, as well as  
598 a bilateral 6-ROI network, but focus on those effects that were consistent across these  
599 networks.

#### 600 **4.1 Face repetition effects**

601 Our main interest concerned the effects of immediate and delayed repetition of stimuli,  
602 specifically whether the well-documented repetition suppression (RS) in OFA and FFA is  
603 best explained by local changes (self-connections in DCM), as predicted by fatigue and  
604 sharpening theories, or by between-ROI connections, as predicted by synchronization and  
605 predictive coding theories (see Introduction). When using a simple 2-ROI network of right  
606 OFA and right FFA, as in Ewbank et al. (2013), we found evidence that both immediate and  
607 delayed repetition modulated the FFA self-connection and connections between OFA and  
608 FFA (and similarly for the two homologous regions in the left hemisphere). This is not  
609 consistent with the findings of Ewbank et al., who found that repetition affected only the  
610 connection from OFA to FFA (when the face image was the same size, as here). This  
611 discrepancy could reflect several factors, including the present use of a randomized rather  
612 than blocked design, where a randomized design reduces the influence of expectation of  
613 repetition (Henson, 2016).

614 More importantly however, the 2-ROI network does not allow repetition to modulate  
615 the input to OFA and/or FFA. In other words, the 2-ROI model considered by Ewbank et al

616 (2013) does not allow RS to arise earlier in the visual processing pathway, i.e., in the inputs  
617 to OFA and/or FFA. To accommodate this, we also fit a 3-ROI network in which a third ROI,  
618 early visual cortex (EVC), was connected to both OFA and FFA. For the right hemisphere,  
619 we now found that immediate repetition modulated both “forward” and “backward”  
620 connections between rEVC and rOFA/FFA, but there was no longer evidence that it  
621 modulated the direct connections between rOFA and rFFA, or the self-connections of rFFA  
622 (or rOFA). Thus contrary to the 2-ROI architecture, the 3-ROI architecture, by allowing  
623 repetition to modulate the input to OFA and FFA, instead favoured synchronization or  
624 predictive coding accounts of RS, at least for immediate repetition.

625 Our last step was to test the modulation of repetition in the 6-ROI network, which  
626 allowed additional interhemispheric modulation. Like for the 3-ROI, right hemisphere  
627 network, we found that immediate repetition modulated the connections between EVC and  
628 OFA/FFA, but not direct connections between OFA and FFA, nor self-connections of  
629 OFA/FFA. The same pattern was now also found for delayed repetition. Thus, the consistent  
630 findings of between-region modulations across 2-, 3- and 6-ROI networks suggests that RS  
631 is caused by interactions between regions, as predicted by synchronization and predictive  
632 coding models. It should be noted however that synaptic depression (one possible neural  
633 mechanism of fatigue model) could explain reduced effective connectivity between regions  
634 if it is the synapses from EVC to OFA/FFA that are depressed by prior processing – i.e.,  
635 mapping of Fatigue to local effects not simple.

636 Finally, note that these repetition effects were averaged across familiar, unfamiliar and  
637 scrambled faces, because we did not find significant interactions between repetition and  
638 stimulus-type in the univariate activation of the six ROIs (except in lOFA, but this would not  
639 survive correction for multiple comparisons across ROIs). For example, one might have  
640 expected greater RS in OFA and FFA for faces than scrambled faces. This lack of interactions

641 was true for both immediate and delayed repetition, despite the greater RS overall for  
642 immediate repetition (Table 1). The lack of interactions was surprising, because we have  
643 found such interactions in previous work (e.g., Henson et al., 2000), though these tended to  
644 use larger lags between initial and repeated presentations, and lag may modulate repetition  
645 effects (Henson, 2016).

## 646 **4.2 Face perception effects**

647 When we compared whether the input was to one or both ROIs in the 2-ROI network,  
648 we found strong evidence that input to both ROIs was needed. This is consistent with  
649 imaging evidence from patients with OFA lesions reported by Rossion et al. (2008), who still  
650 showed FFA activation. The 3-ROI network provided further support for this, with evidence  
651 that connections from EVC to both OFA and FFA were modulated by faces. This suggests  
652 that face information is already extracted in the transformations from EVC to OFA and FFA,  
653 contrary to the “standard” hierarchical model that assumes that input to FFA only arises from  
654 OFA.

655 Several previous DCM studies have examined the face modulations among EVC, OFA  
656 and FFA. Consistent with our results, Lohse et al. (2016) found face modulation on “forward”  
657 connections from rEVC to rOFA and to rFFA, while Furl et al. (2015) found face modulation  
658 on the connection from rEVC to rOFA only. Frässle et al.’s (2016) study was the only one to  
659 include bilateral EVC, OFA and FFA. Their results revealed face modulation on connections  
660 from EVC to OFA, and between right and left OFA, like in our 6-ROI network, but also from  
661 OFA to FFA, unlike in our 3- and 6-ROI networks. However, the latter is most likely because  
662 they did not allow any direct connections (and hence modulations) between EVC and FFA.  
663 In addition, none of these studies allowed modulations on self-connections. Our study  
664 estimated all possible DCM connections and modulations among EVC, OFA and FFA, and



665 showed that “forward” (EVC to OFA), “backward” (OFA to EVC) and inter-hemispheric  
666 modulations were needed for face perception in our data, but not direct connections between  
667 OFA and FFA.

668 While our 6-ROI results were generally comparable with our 3-ROI results, the striking  
669 differences between our 2-ROI and 3-ROI results highlight the importance of the model  
670 architecture when testing hypotheses with DCM. While our results show that the addition of  
671 an EVC region has important effects on the conclusions one draws, it is possible that the  
672 results would change again if other regions were added, like anterior temporal lobes,  
673 amygdala (Xiu et al., 2015), or in particular superior temporal sulcus (STS), which is well-  
674 known to have face-responsive neurons (Furl et al., 2015; Kessler et al., 2021; Lohse et al.,  
675 2016). Indeed, using an exhaustive data-driven approach called “Group Iterative Multiple  
676 Model Estimation” (Gates & Molenaar, 2012), Elbich et al. (2019) found that connections  
677 from STS to OFA/FFA were also modulated by faces. Though STS did not show significant  
678 face-related activation that surpassed our corrected threshold, which is why we did not  
679 include it here, future work could add STS to DCM networks like the ones here.

680 There are other differences between prior studies that may also affect which  
681 connections are modulated by face processing, such as the specific stimuli contrasted with  
682 faces (e.g., phase-scrambled faces, as here, versus non-face stimuli like objects or cars, Furl  
683 et al., 2015; Lohse et al., 2016) or the type of design (e.g., randomized versus blocked,  
684 Frässle et al., 2016; Furl et al., 2015; Lohse et al., 2016), which can affect top-down  
685 expectancies for a certain type of stimulus. The role of these factors could be explicitly tested  
686 in future empirical studies.

### 687 **4.3 Face recognition effects**

688 When analysing the right hemisphere networks, we were not able to uniquely attribute

689 face recognition effects to specific connection-types. Note that this does not mean that DCM  
690 could not reproduce the greater activations to familiar faces that was found in many of the  
691 ROIs (including right hemisphere; Figure 2); it just means that the timeseries related to  
692 familiar faces did not allow inference about which type of connection would uniquely  
693 reproduce the distinct parts of that timeseries (compared to other stimulus types). In other  
694 words, it is possible that changes in self, forward or backward connections could equally  
695 well explain the distinct part of the ROI timeseries related to face recognition. When  
696 analysing the left hemisphere networks, on the other hand, it appeared that the IOFA self-  
697 connection was modulated by face recognition.

698         However, when analysing the bilateral 6-ROI network, a different result emerged, with  
699 face recognition modulating forward connections from EVC to OFA and FFA (averaged  
700 across hemispheres), as well as from OFA to EVC. Given these quite different results across  
701 the various networks, we remain cautious about interpreting connectivity changes associated  
702 with recognition of familiar faces, particularly since such recognition may also involve  
703 interactions with more anterior regions like anterior temporal lobes (ATL) and orbitofrontal  
704 cortex (OFC) (Fairhall & Ishai, 2007), and possibly even left lateral prefrontal regions  
705 associated with covert naming of known faces. Future DCM models could investigate  
706 whether the greater activation to familiar faces in the present ROIs reflect top-down feedback  
707 from regions “higher” on the visual processing pathway (e.g., using better matched stimuli,  
708 cognitive tasks that explicitly require face identification, and fMRI sequences optimised to  
709 handle signal drop-out in OFC and ATL).

#### 710         **4.4 Hemispheric Differences**

711         Most studies examined connectivity among regions in the right hemisphere because of  
712 the hypothesized specialization of right hemisphere for face processing (Kanwisher et al.,

713 1997). However, Frässle et al. (2016) included OFA and FFA in both hemispheres, and  
714 claimed that the right lateralization of the activation pattern was due to an interhemispheric  
715 modulation from left to right OFA. Furthermore, because their face images were presented  
716 in either the right or left visual field, they found evidence of modulation of connections from  
717 EVC to OFA in both hemispheres by both the visual field and the presence of faces. Though  
718 faces were presented centrally in our data, our 6-ROI network also found modulation by  
719 faces on both interhemispheric connections and EVC-to-OFA connections in both  
720 hemispheres, supporting the claim that face processing is not specific to the right hemisphere.

#### 721 **4.5 Limitations and future directions**

722 There are several methodological limitations of this study. First, any DCM analysis  
723 evaluates models defined within a certain architecture (determined by the number of ROIs  
724 and connections allowed between them). This means there may be other more probable  
725 models comprising different regions and connections. In this study, we focused on two  
726 regions showing significant experimental effects of face and repetition, OFA and FFA, and  
727 their likely input region, EVC, and allowed for some variations in architecture by focusing  
728 on results that were consistent across 3 different networks (2-ROI, 3-ROI and 6-ROI  
729 networks). More generally, one could use lots of ROIs and evaluate whether a method like  
730 Bayesian model reduction (BMR) or Group Iterative Multiple Model Estimation will reveal  
731 the most parsimonious set of connections between them. However, when we tried BMR here,  
732 the results were difficult to interpret, at least when more than two ROIs, most likely because  
733 of the high co-dependency between connection parameters in such fully-connected and  
734 recurrent networks, and so we resorted to more hypothesis-driven BMC to focus on specific  
735 connection types.

736 The second limitation is that, while both synchronization and predictive coding models

737 are consistent with the general concept of repetition affecting connectivity between regions,  
738 the direction of this effective connectivity remains unclear. In predictive coding for example,  
739 repetition both improves top-down predictions and reduces bottom-up prediction errors, and  
740 it is unclear how either of these relate precisely to forward and backward fMRI connectivity.  
741 One way to address this issue is to apply DCM to EEG and/or MEG data. The much richer  
742 dynamics in EEG/MEG evoked responses allows fitting of more complex  
743 neurophysiological models, e.g., “canonical microcircuit” model (Bastos et al., 2012), in  
744 which forward and backward connections operate with different timescales. Furthermore,  
745 predictive coding does not rule out within-region (self-connection) modulation too,  
746 particularly in more complex implementations that allow for interactions between cells  
747 within different layers of cortex within the same ROI. Future high-resolution fMRI, e.g., at  
748 7T, might allow separate modelling of cortical layers. Predictive coding theory would predict  
749 that repetition causes reduced activity in superficial pyramidal cells in the supragranular  
750 layer, and changes in its connectivity with inhibitory interneurons in other layers.

#### 751 **4.6 Conclusion**

752 To conclude, we used DCM to examine the effective connectivity among face-selective  
753 regions during face repetition, face perception and face recognition. The simplest conclusion  
754 about repetition suppression is that it reflects more than local changes within a region, so  
755 fatigue or sharpening models are not sufficient; rather, the repetition-related modulation of  
756 between-region connections is consistent with synchronization and/or predictive coding  
757 models of repetition suppression (Ewbank & Henson, 2012). While the effective  
758 connectivity associated with recognition remains unclear, a consistent finding regarding face  
759 perception is that it includes modulation of connections direct from EVC to FFA, without  
760 needing modulation from OFA to FFA, which supports recent suggestions for a non-

761 hierarchical view of the “core” face network in the posterior ventral stream.

762

### 763 **Acknowledgements**

764 S-M.L. was supported by the Study Abroad Program of Ministry of Science and Technology,  
765 Taiwan (108-2917-I-006-009); R.T. was supported by a British Academy Postdoctoral  
766 Fellowship (SUAI/028 RG94188). P.Z. was supported by core funding from Wellcome  
767 awarded to the Wellcome Centre for Human Neuroimaging (203147/Z/16/Z). P.S.Y. was  
768 supported by core funding from SRK Medicare Pvt. Ltd., India. R.H. was supported by UK  
769 Medical Research Council programme grant (SUAG/086 G116768). For the purpose of open  
770 access, the authors have applied a Creative Commons Attribution (CC BY) licence to any  
771 Author Accepted Manuscript version arising from this submission.

772

### 773 **References**

- 774 Avidan, G., Hasson, U., Hendler, T., Zohary, E., & Malach, R. (2002). Analysis of the  
775 Neuronal Selectivity Underlying Low fMRI Signals. *Current Biology*, *12*(12), 964–  
776 972. [https://doi.org/10.1016/S0960-9822\(02\)00872-2](https://doi.org/10.1016/S0960-9822(02)00872-2)
- 777 Babo-Rebelo, M., Puce, A., Bullock, D., Hugueville, L., Pestilli, F., Adam, C., Lehongre,  
778 K., Lambrecq, V., Dinkelacker, V., & George, N. (2022). Visual Information Routes  
779 in the Posterior Dorsal and Ventral Face Network Studied with Intracranial  
780 Neurophysiology and White Matter Tract Endpoints. *Cerebral Cortex*, *32*(2), 342–  
781 366. <https://doi.org/10.1093/cercor/bhab212>
- 782 Bastos, A. M., Usrey, W. M., Adams, R. A., Mangun, G. R., Fries, P., & Friston, K. J.  
783 (2012). Canonical Microcircuits for Predictive Coding. *Neuron*, *76*(4), 695–711.  
784 <https://doi.org/10.1016/j.neuron.2012.10.038>

- 785 Damasio, A. R., Tranel, D., & Damasio, H. (1990). Face Agnosia and the Neural Substrates  
786 of Memory. *Annual Review of Neuroscience*, 13(1), 89–109.  
787 <https://doi.org/10.1146/annurev.ne.13.030190.000513>
- 788 Desimone, R. (1996). Neural mechanisms for visual memory and their role in attention.  
789 *Proceedings of the National Academy of Sciences*, 93(24), 13494–13499.  
790 <https://doi.org/10.1073/pnas.93.24.13494>
- 791 Egner, T., Monti, J. M., & Summerfield, C. (2010). Expectation and Surprise Determine  
792 Neural Population Responses in the Ventral Visual Stream. *Journal of*  
793 *Neuroscience*, 30(49), 16601–16608. [https://doi.org/10.1523/JNEUROSCI.2770-](https://doi.org/10.1523/JNEUROSCI.2770-10.2010)  
794 10.2010
- 795 Elbich, D. B., Molenaar, P. C. M., & Scherf, K. S. (2019). Evaluating the organizational  
796 structure and specificity of network topology within the face processing system.  
797 *Human Brain Mapping*, 40(9), 2581–2595. <https://doi.org/10.1002/hbm.24546>
- 798 Epstein, R. A., Parker, W. E., & Feiler, A. M. (2008). Two Kinds of fMRI Repetition  
799 Suppression? Evidence for Dissociable Neural Mechanisms. *Journal of*  
800 *Neurophysiology*, 99(6), 2877–2886. <https://doi.org/10.1152/jn.90376.2008>
- 801 Ewbank, M. P., & Henson, R. N. (2012). Explaining away repetition effects via predictive  
802 coding. *Cognitive Neuroscience*, 3(3–4), 239–240.  
803 <https://doi.org/10.1080/17588928.2012.689960>
- 804 Ewbank, M. P., Henson, R. N., Rowe, J. B., Stoyanova, R. S., & Calder, A. J. (2013).  
805 Different Neural Mechanisms within Occipitotemporal Cortex Underlie Repetition  
806 Suppression across Same and Different-Size Faces. *Cerebral Cortex*, 23(5), 1073–  
807 1084. <https://doi.org/10.1093/cercor/bhs070>
- 808 Ewbank, M. P., Lawson, R. P., Henson, R. N., Rowe, J. B., Passamonti, L., & Calder, A. J.  
809 (2011). Changes in “Top-Down” Connectivity Underlie Repetition Suppression in

- 810 the Ventral Visual Pathway. *Journal of Neuroscience*, 31(15), 5635–5642.  
811 <https://doi.org/10.1523/JNEUROSCI.5013-10.2011>
- 812 Fairhall, S. L., & Ishai, A. (2007). Effective Connectivity within the Distributed Cortical  
813 Network for Face Perception. *Cerebral Cortex*, 17(10), 2400–2406.  
814 <https://doi.org/10.1093/cercor/bhl148>
- 815 Frässle, S., Paulus, F. M., Krach, S., Schweinberger, S. R., Stephan, K. E., & Jansen, A.  
816 (2016). Mechanisms of hemispheric lateralization: Asymmetric interhemispheric  
817 recruitment in the face perception network. *NeuroImage*, 124, 977–988.  
818 <https://doi.org/10.1016/j.neuroimage.2015.09.055>
- 819 Friston, K. J. (2005). A theory of cortical responses. *Philosophical Transactions of the*  
820 *Royal Society B: Biological Sciences*, 360(1456), 815–836.  
821 <https://doi.org/10.1098/rstb.2005.1622>
- 822 Friston, K. J., Harrison, L., & Penny, W. (2003). Dynamic causal modelling. *NeuroImage*,  
823 19(4), 1273–1302. [https://doi.org/10.1016/S1053-8119\(03\)00202-7](https://doi.org/10.1016/S1053-8119(03)00202-7)
- 824 Friston, K. J., Zeidman, P., & Litvak, V. (2015). Empirical Bayes for DCM: A Group  
825 Inversion Scheme. *Frontiers in Systems Neuroscience*, 9.  
826 <https://www.frontiersin.org/article/10.3389/fnsys.2015.00164>
- 827 Furl, N., Henson, R. N., Friston, K. J., & Calder, A. J. (2015). Network Interactions  
828 Explain Sensitivity to Dynamic Faces in the Superior Temporal Sulcus. *Cerebral*  
829 *Cortex*, 25(9), 2876–2882. <https://doi.org/10.1093/cercor/bhu083>
- 830 Gainotti, G., & Marra, C. (2011). Differential Contribution of Right and Left Temporo-  
831 Occipital and Anterior Temporal Lesions to Face Recognition Disorders. *Frontiers*  
832 *in Human Neuroscience*, 5. <https://doi.org/10.3389/fnhum.2011.00055>
- 833 Gates, K. M., & Molenaar, P. C. M. (2012). Group search algorithm recovers effective  
834 connectivity maps for individuals in homogeneous and heterogeneous samples.

- 835 *NeuroImage*, 63(1), 310–319. <https://doi.org/10.1016/j.neuroimage.2012.06.026>
- 836 Gentile, F., Ales, J., & Rossion, B. (2017). Being BOLD: The neural dynamics of face  
837 perception. *Human Brain Mapping*, 38(1), 120–139.  
838 <https://doi.org/10.1002/hbm.23348>
- 839 Ghuman, A. S., Bar, M., Dobbins, I. G., & Schnyer, D. M. (2008). The effects of priming  
840 on frontal-temporal communication. *Proceedings of the National Academy of  
841 Sciences*, 105(24), 8405–8409. <https://doi.org/10.1073/pnas.0710674105>
- 842 Gotts, S. J. (2016). Incremental learning of perceptual and conceptual representations and  
843 the puzzle of neural repetition suppression. *Psychonomic Bulletin & Review*, 23(4),  
844 1055–1071. <https://doi.org/10.3758/s13423-015-0855-y>
- 845 Gotts, S. J., Chow, C. C., & Martin, A. (2012). Repetition priming and repetition  
846 suppression: Multiple mechanisms in need of testing. *Cognitive Neuroscience*, 3(3–  
847 4), 250–259. <https://doi.org/10.1080/17588928.2012.697054>
- 848 Grill-Spector, K., Henson, R. N., & Martin, A. (2006). Repetition and the brain: Neural  
849 models of stimulus-specific effects. *Trends in Cognitive Sciences*, 10(1), 14–23.  
850 <https://doi.org/10.1016/j.tics.2005.11.006>
- 851 Grill-Spector, K., Kushnir, T., Edelman, S., Avidan, G., Itzhak, Y., & Malach, R. (1999).  
852 Differential Processing of Objects under Various Viewing Conditions in the Human  
853 Lateral Occipital Complex. *Neuron*, 24(1), 187–203. [https://doi.org/10.1016/S0896-  
854 6273\(00\)80832-6](https://doi.org/10.1016/S0896-6273(00)80832-6)
- 855 Grill-Spector, K., & Malach, R. (2001). fMR-adaptation: A tool for studying the functional  
856 properties of human cortical neurons. *Acta Psychologica*, 107(1), 293–321.  
857 [https://doi.org/10.1016/S0001-6918\(01\)00019-1](https://doi.org/10.1016/S0001-6918(01)00019-1)
- 858 Grotheer, M., & Kovács, G. (2015). The relationship between stimulus repetitions and  
859 fulfilled expectations. *Neuropsychologia*, 67, 175–182.



- 860 <https://doi.org/10.1016/j.neuropsychologia.2014.12.017>
- 861 Haxby, J. V., Hoffman, E. A., & Gobbini, M. I. (2000). The distributed human neural  
862 system for face perception. *Trends in Cognitive Sciences*, 4(6), 223–233.  
863 [https://doi.org/10.1016/S1364-6613\(00\)01482-0](https://doi.org/10.1016/S1364-6613(00)01482-0)
- 864 Henson, R. N. (2016). Repetition suppression to faces in the fusiform face area: A personal  
865 and dynamic journey. *Cortex*, 80, 174–184.  
866 <https://doi.org/10.1016/j.cortex.2015.09.012>
- 867 Henson, R. N., Goshen-Gottstein, Y., Ganel, T., Otten, L. J., Quayle, A., & Rugg, M. D.  
868 (2003). Electrophysiological and Haemodynamic Correlates of Face Perception,  
869 Recognition and Priming. *Cerebral Cortex*, 13(7), 793–805.  
870 <https://doi.org/10.1093/cercor/13.7.793>
- 871 Henson, R. N., & Mouchlianitis, E. (2007). Effect of spatial attention on stimulus-specific  
872 haemodynamic repetition effects. *NeuroImage*, 35(3), 1317–1329.  
873 <https://doi.org/10.1016/j.neuroimage.2007.01.019>
- 874 Henson, R. N., & Rugg, M. D. (2003). Neural response suppression, haemodynamic  
875 repetition effects, and behavioural priming. *Neuropsychologia*, 41(3), 263–270.  
876 [https://doi.org/10.1016/S0028-3932\(02\)00159-8](https://doi.org/10.1016/S0028-3932(02)00159-8)
- 877 Henson, R. N., Shallice, T., & Dolan, R. (2000). Neuroimaging Evidence for Dissociable  
878 Forms of Repetition Priming. *Science*, 287(5456), 1269–1272.  
879 <https://doi.org/10.1126/science.287.5456.1269>
- 880 Ishai, A., Schmidt, C. F., & Boesiger, P. (2005). Face perception is mediated by a  
881 distributed cortical network. *Brain Research Bulletin*, 67(1), 87–93.  
882 <https://doi.org/10.1016/j.brainresbull.2005.05.027>
- 883 Jiang, X., Bradley, E., Rini, R. A., Zeffiro, T., VanMeter, J., & Riesenhuber, M. (2007).  
884 Categorization Training Results in Shape- and Category-Selective Human Neural

- 885           Plasticity. *Neuron*, 53(6), 891–903. <https://doi.org/10.1016/j.neuron.2007.02.015>
- 886   Jiang, X., Rosen, E., Zeffiro, T., VanMeter, J., Blanz, V., & Riesenhuber, M. (2006).  
887           Evaluation of a Shape-Based Model of Human Face Discrimination Using fMRI  
888           and Behavioral Techniques. *Neuron*, 50(1), 159–172.  
889           <https://doi.org/10.1016/j.neuron.2006.03.012>
- 890   Kanwisher, N., McDermott, J., & Chun, M. M. (1997). The Fusiform Face Area: A Module  
891           in Human Extrastriate Cortex Specialized for Face Perception. *Journal of*  
892           *Neuroscience*, 17(11), 4302–4311. [https://doi.org/10.1523/JNEUROSCI.17-11-](https://doi.org/10.1523/JNEUROSCI.17-11-04302.1997)  
893           04302.1997
- 894   Kessler, R., Rusch, K. M., Wende, K. C., Schuster, V., & Jansen, A. (2021). Revisiting the  
895           effective connectivity within the distributed cortical network for face perception.  
896           *Neuroimage: Reports*, 1(4), 100045. <https://doi.org/10.1016/j.ynirp.2021.100045>
- 897   Larsson, J., Solomon, S. G., & Kohn, A. (2016). FMRI adaptation revisited. *Cortex*, 80,  
898           154–160. <https://doi.org/10.1016/j.cortex.2015.10.026>
- 899   Li, L., Miller, E. K., & Desimone, R. (1993). The representation of stimulus familiarity in  
900           anterior inferior temporal cortex. *Journal of Neurophysiology*, 69(6), 1918–1929.  
901           <https://doi.org/10.1152/jn.1993.69.6.1918>
- 902   Lohse, M., Garrido, L., Driver, J., Dolan, R. J., Duchaine, B. C., & Furl, N. (2016).  
903           Effective Connectivity from Early Visual Cortex to Posterior Occipitotemporal  
904           Face Areas Supports Face Selectivity and Predicts Developmental Prosopagnosia.  
905           *Journal of Neuroscience*, 36(13), 3821–3828.  
906           <https://doi.org/10.1523/JNEUROSCI.3621-15.2016>
- 907   McMahon, D. B. T., & Olson, C. R. (2007). Repetition Suppression in Monkey  
908           Inferotemporal Cortex: Relation to Behavioral Priming. *Journal of*  
909           *Neurophysiology*, 97(5), 3532–3543. <https://doi.org/10.1152/jn.01042.2006>

- 910 Murray, S. O., & Wojciulik, E. (2004). Attention increases neural selectivity in the human  
911 lateral occipital complex. *Nature Neuroscience*, 7(1), 70–74.  
912 <https://doi.org/10.1038/nm1161>
- 913 Rossion, B. (2008). Constraining the cortical face network by neuroimaging studies of  
914 acquired prosopagnosia. *NeuroImage*, 40(2), 423–426.  
915 <https://doi.org/10.1016/j.neuroimage.2007.10.047>
- 916 Rossion, B. (2018). Damasio’s error – Prosopagnosia with intact within-category object  
917 recognition. *Journal of Neuropsychology*, 12(3), 357–388.  
918 <https://doi.org/10.1111/jnp.12162>
- 919 Rossion, B., Caldara, R., Seghier, M., Schuller, A., Lazeyras, F., & Mayer, E. (2003). A  
920 network of occipito-temporal face-sensitive areas besides the right middle fusiform  
921 gyrus is necessary for normal face processing. *Brain*, 126(11), 2381–2395.  
922 <https://doi.org/10.1093/brain/awg241>
- 923 Rowe, J. B., Hughes, L. E., Barker, R. A., & Owen, A. M. (2010). Dynamic causal  
924 modelling of effective connectivity from fMRI: Are results reproducible and  
925 sensitive to Parkinson’s disease and its treatment? *NeuroImage*, 52(3), 1015–1026.  
926 <https://doi.org/10.1016/j.neuroimage.2009.12.080>
- 927 Steeves, J., Dricot, L., Goltz, H. C., Sorger, B., Peters, J., Milner, A. D., Goodale, M. A.,  
928 Goebel, R., & Rossion, B. (2009). Abnormal face identity coding in the middle  
929 fusiform gyrus of two brain-damaged prosopagnosic patients. *Neuropsychologia*,  
930 47(12), 2584–2592. <https://doi.org/10.1016/j.neuropsychologia.2009.05.005>
- 931 Stephan, K. E., Weiskopf, N., Drysdale, P. M., Robinson, P. A., & Friston, K. J. (2007).  
932 Comparing hemodynamic models with DCM. *NeuroImage*, 38(3), 387–401.  
933 <https://doi.org/10.1016/j.neuroimage.2007.07.040>
- 934 Summerfield, C., Trittschuh, E. H., Monti, J. M., Mesulam, M.-M., & Egner, T. (2008).

- 935 Neural repetition suppression reflects fulfilled perceptual expectations. *Nature*  
936 *Neuroscience*, 11(9), 1004–1006. <https://doi.org/10.1038/nm.2163>
- 937 Wakeman, D. G., & Henson, R. N. (2015). A multi-subject, multi-modal human  
938 neuroimaging dataset. *Scientific Data*, 2, 150001.  
939 <https://doi.org/10.1038/sdata.2015.1>
- 940 Wiggs, C. L., & Martin, A. (1998). Properties and mechanisms of perceptual priming.  
941 *Current Opinion in Neurobiology*, 8(2), 227–233. <https://doi.org/10.1016/S0959->  
942 [4388\(98\)80144-X](https://doi.org/10.1016/S0959-4388(98)80144-X)
- 943 Xiu, D., Geiger, M. J., & Klaver, P. (2015). Emotional face expression modulates occipital-  
944 frontal effective connectivity during memory formation in a bottom-up fashion.  
945 *Frontiers in Behavioral Neuroscience*, 9. <https://doi.org/10.3389/fnbeh.2015.00090>
- 946 Zeidman, P., Jafarian, A., Seghier, M. L., Litvak, V., Cagnan, H., Price, C. J., & Friston, K.  
947 J. (2019). A guide to group effective connectivity analysis, part 2: Second level  
948 analysis with PEB. *NeuroImage*, 200, 12–25.  
949 <https://doi.org/10.1016/j.neuroimage.2019.06.032>
- 950
